# Supplementary material for: Web Application for Quantification of Traumatic Brain Injury-Induced Cortical Lesions in Adult Mice
Source: PubMed Central journal article supplement (PMC7083813; doi:10.1007/s12021-019-09444-9), 2019-12-04

# Normalization

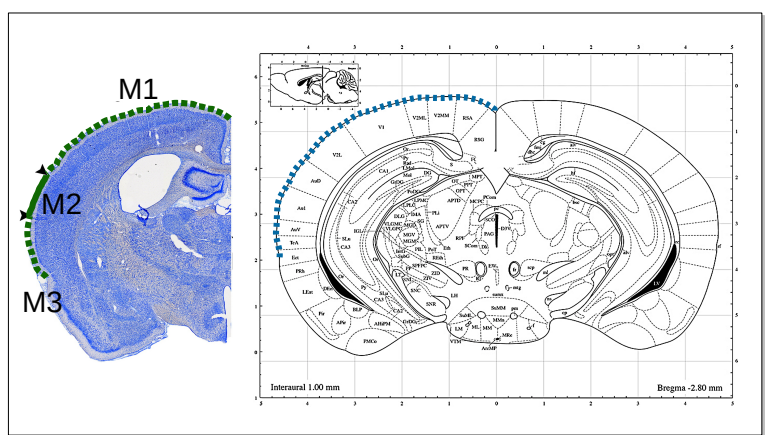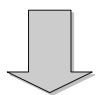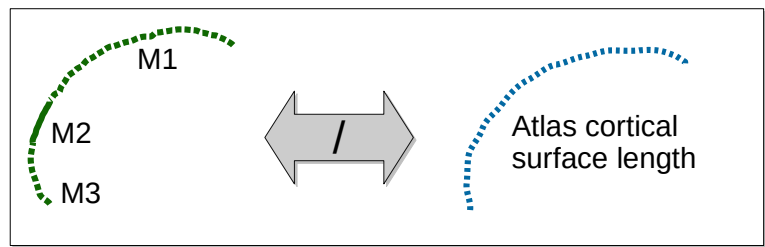

$m/a$  Measurement vs. atlas ratio

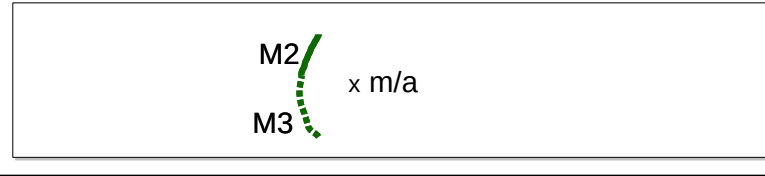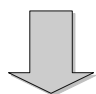

# Translation

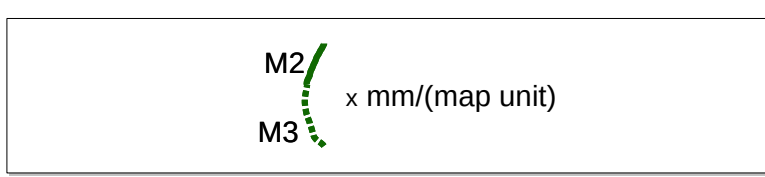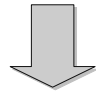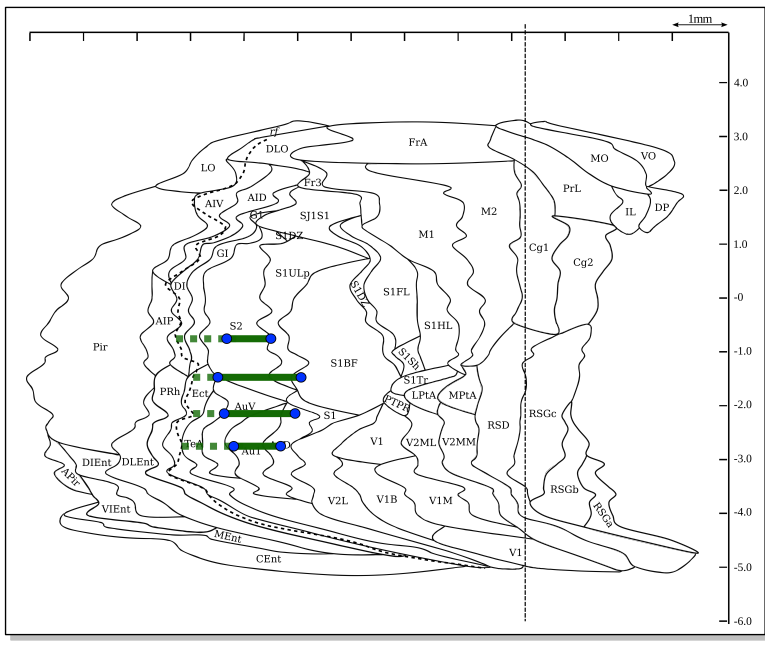

# Quantification

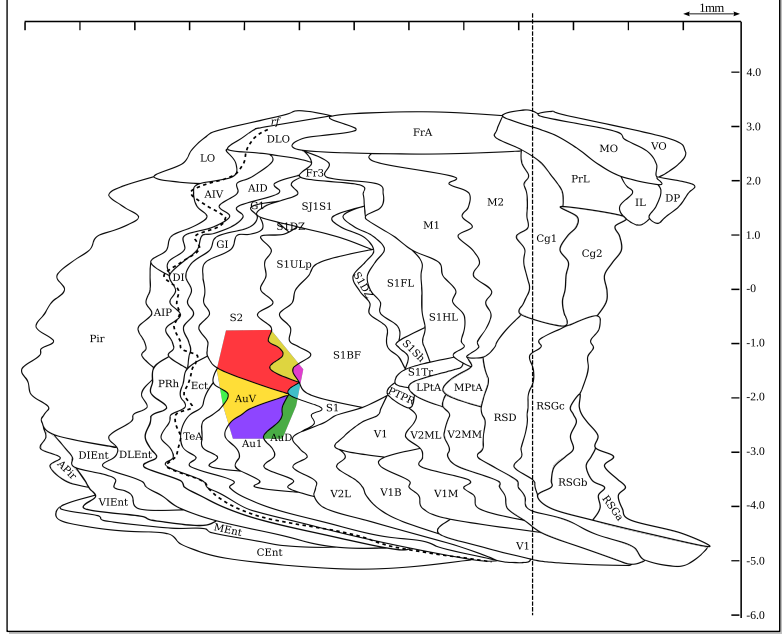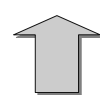

# Interpolation

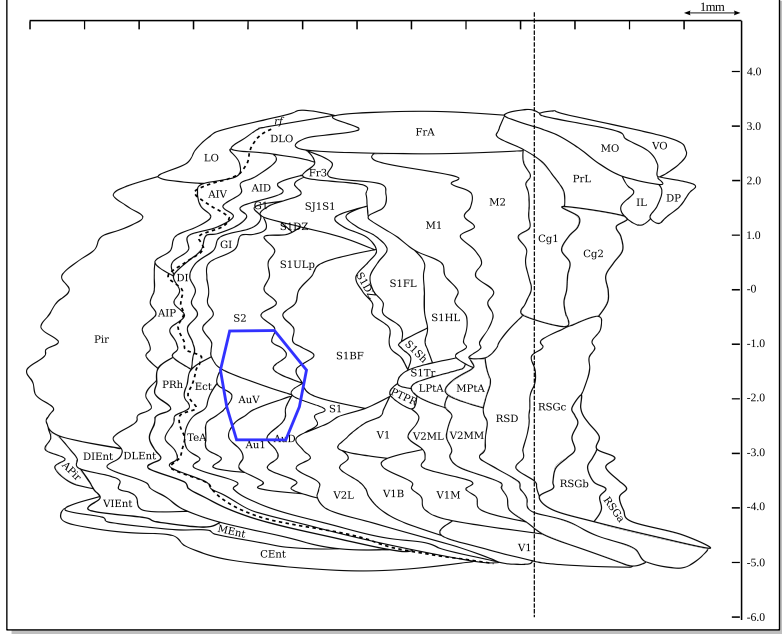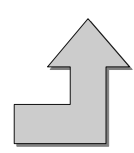

Supplement: 12021_2019_9444_MOESM3_ESM.pdf [file 12021_2019_9444_MOESM3_ESM.pdf]
